# Supplementary material
Source: Research Square preprint supplement (doi:10.21203/rs.3.rs-9765283/v1)
Supplement: Supplementary file 1 [file ee00a553c7c801acb56770bf.pdf]

1 *Supporting Information*

2 **Engineering a terephthalate-responsive PcbR biosensor for discovering**  
3 **PET-degrading microbes via cell-to-cell communication**

4 **Jung-Ung An<sup>1,2†</sup>, Seok Jin Oh<sup>1,3†</sup>, Bong Hyun Sung<sup>1,3,4,5</sup>, Seung-Goo Lee<sup>3,4,5</sup>, Kil Koang**  
5 **Kwon<sup>1,3,4\*</sup>, and Dae-Hee Lee<sup>1,3,4,5,6\*</sup>**

6 <sup>1</sup>Synthetic Biology Research Center and Korea Biofoundry, Korea Research Institute of  
7 Bioscience and Biotechnology (KRIBB), Daejeon 34141, Republic of Korea

8 <sup>2</sup>Fermentation Convergence Research Group, Korea Food Research Institute (KFRI), Wanju  
9 55365, Republic of Korea

10 <sup>3</sup>Department of Biosystems and Bioengineering, KRIBB School of Biotechnology, University of  
11 Science and Technology (UST), Daejeon 34113, Republic of Korea

12 <sup>4</sup>Korea Biofoundry, Korea Research Institute of Bioscience and Biotechnology (KRIBB), Daejeon  
13 34141, Republic of Korea

14 <sup>5</sup>Graduate School of Engineering Biology, Korea Advanced Institute of Science and Technology  
15 (KAIST), Daejeon 34141, Republic of Korea

16 <sup>6</sup>Department of Integrative Biotechnology, College of Biotechnology and Bioengineering,  
17 Sungkyunkwan University, Suwon 16419, Republic of Korea

18 †These authors contributed equally to this work.

19 \*Correspondence: kkkwon@kribb.re.kr; dhlee@kribb.re.kr

20 **This file includes:**

21 **Table S1.** Primers used in this study.

22 **Figure S1.** Dose-response analysis of PobR\_2 toward 4-HB and TPA over the 0-0.5 mM range.

23 **Figure S2.** Flow-cytometry analysis of 1,000 single clones recovered after FACS enrichment  
24 under 1 mM TPA induction.

25 **Figure S3.** Secondary screening of recovered PobR variants in the absence and presence of 1 mM  
26 TPA.

27 **Figure S4.** Proposed important residues of PobR variant structure.

28 **Figure S5.** Sequence logo analysis of amino acid distributions at mutagenized PobR positions  
29 recovered during TPA-responsive evolution.

30 **Figure S6.** Dose-response comparison of PobR\_2 and PobR\_3 toward 4-HB and TPA over the 0-  
31 1.0 mM range.

32 **Figure S7.** Growth curves and fluorescence outputs of PobR\_4 in different media.

33 **Figure S8.** Growth curves and fluorescence outputs of PobR\_4 in 1/10-diluted LB medium.

34 **Figure S9.** Colony formation and fluorescence of PobR\_4 on solid LB agar containing increasing  
35 TPA concentrations.

36 **Figure S10.** Colony PCR analysis of colonies recovered from the proof-of-concept screening  
37 assay.

38 **Figure S11.** Structural comparison of the ligand-binding pockets of wild-type PobR and PobR\_v10  
39 with docked TPA.

40 **Table S1. Primers used in this study.**

| Primer    | Sequence (5'-3')                          |
|-----------|-------------------------------------------|
| Vector1_F | GAATTCATGGCGATGACGCATCCTCACGATAAT         |
| Vector1_R | ATGAGCAAAGGTGAAGAACTGTTTACCGGCGTTG        |
| PobR_F    | TCATCGCCATTGAATTCTTATACCAAATTACGCA        |
| PobR_R    | TCTTCACCTTTGCTCATAACATCATCCTTGCTAT        |
| Vector2_F | AGGACTGAGCTAGCCGTAAAGCGGCCGCGAATTCTTATAC  |
| Vector2_R | TGTTATCCGCTTTAATTAATAAATGGCGATGACGCATCCTC |
| mMucK_F   | GAGGATGCGTCATCGCCATTTTTAATTAAGCGGATAACA   |
| mMucK_R   | GTATAAGAATTCGCGGCCGCTTTACGGCTAGCTCAGTCCT  |
| Vector3_F | AAATTAAGAGGAGAGAAAATGAGCAAAGGTGAAGA       |
| Vector3_R | CATATGTATATCTCCTTAACATCATCCTTGCTAT        |
| RacE_F    | ATAGCAAGGATGATGTTAAGGAGATATACATATG        |
| RacE_R    | TCTTCACCTTTGCTCATTTTCTCCTCTTTAATTT        |

41

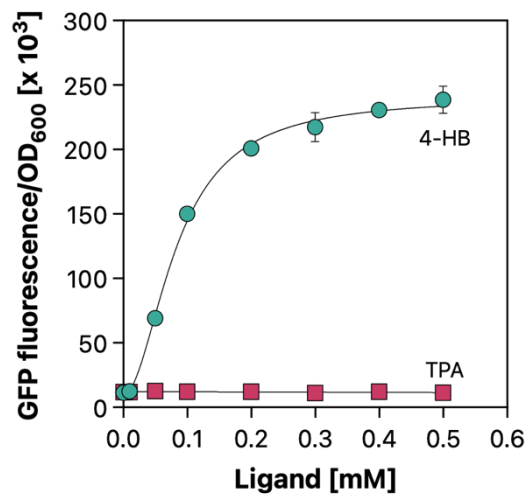

42

43 **Figure S1. Dose-response analysis of PobR\_2 toward 4-HB and TPA over the 0-0.5 mM range.**

44 The green circles were indicated fluorescence intensity of PobR\_1 cell for 4-HB, the red squares

45 were indicated fluorescence intensity of PobR\_1 cell for TPA. The error bars represent the

46 standard deviation.

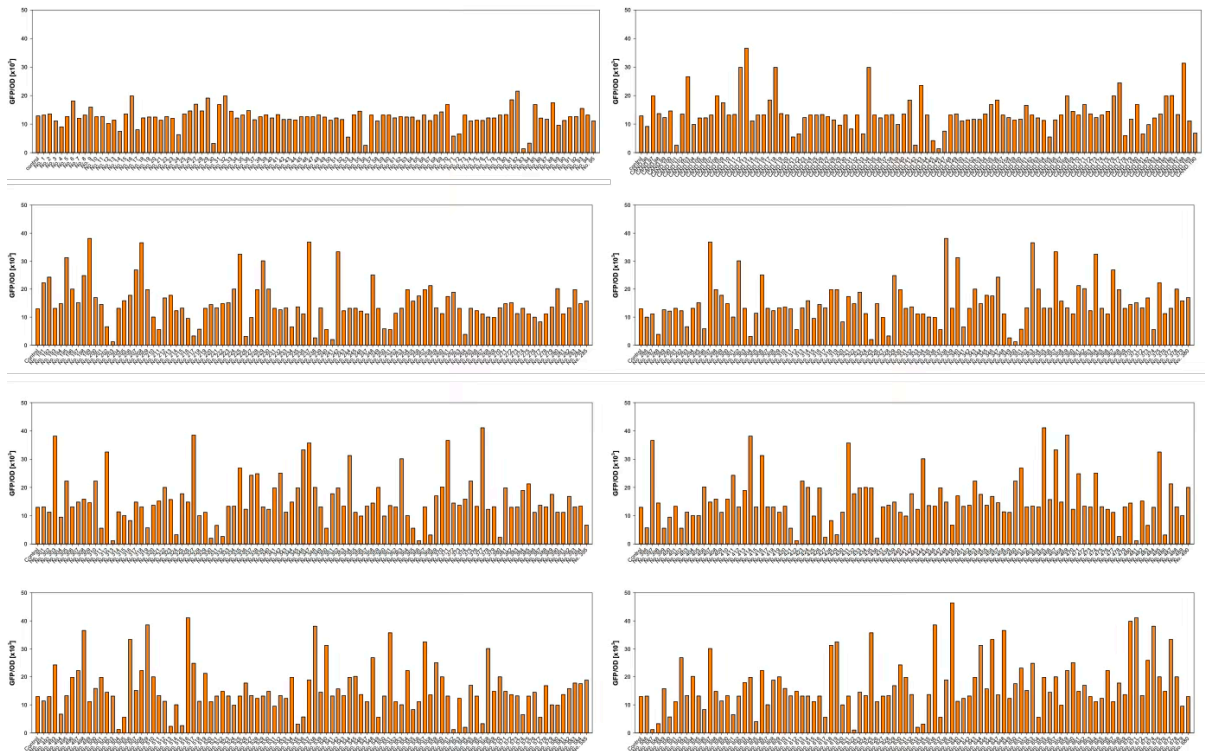

47

48 **Figure S2. Fluorescence screening of 1,000 single clones recovered after FACS enrichment**  
 49 **under 1 mM TPA induction.** Recovered clones were individually cultured and analyzed for GFP  
 50 output to identify variants with increased TPA-responsive fluorescence.

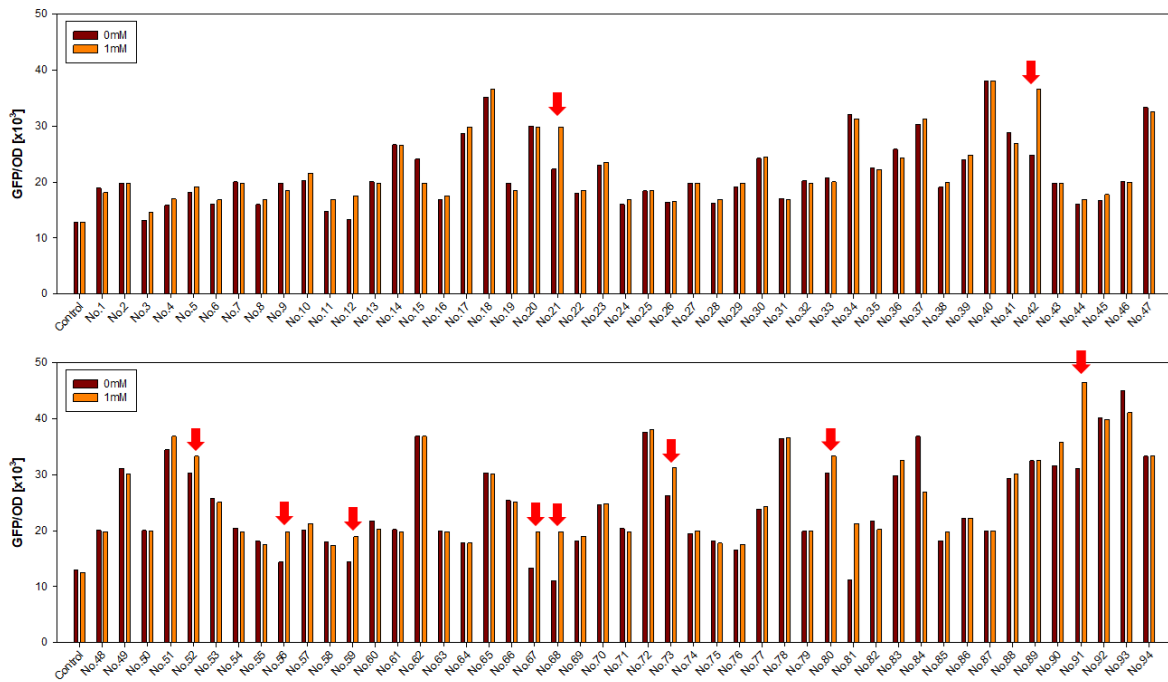

51

52 **Figure S3. Secondary screening of recovered PobR variants in the absence and presence of**  
 53 **1 mM TPA.** Recovered variants were cultured with or without 1 mM TPA, and GFP fluorescence  
 54 normalized by cell density was measured to identify TPA-responsive clones. Arrows indicate  
 55 selected variants showing increased TPA-dependent activation.

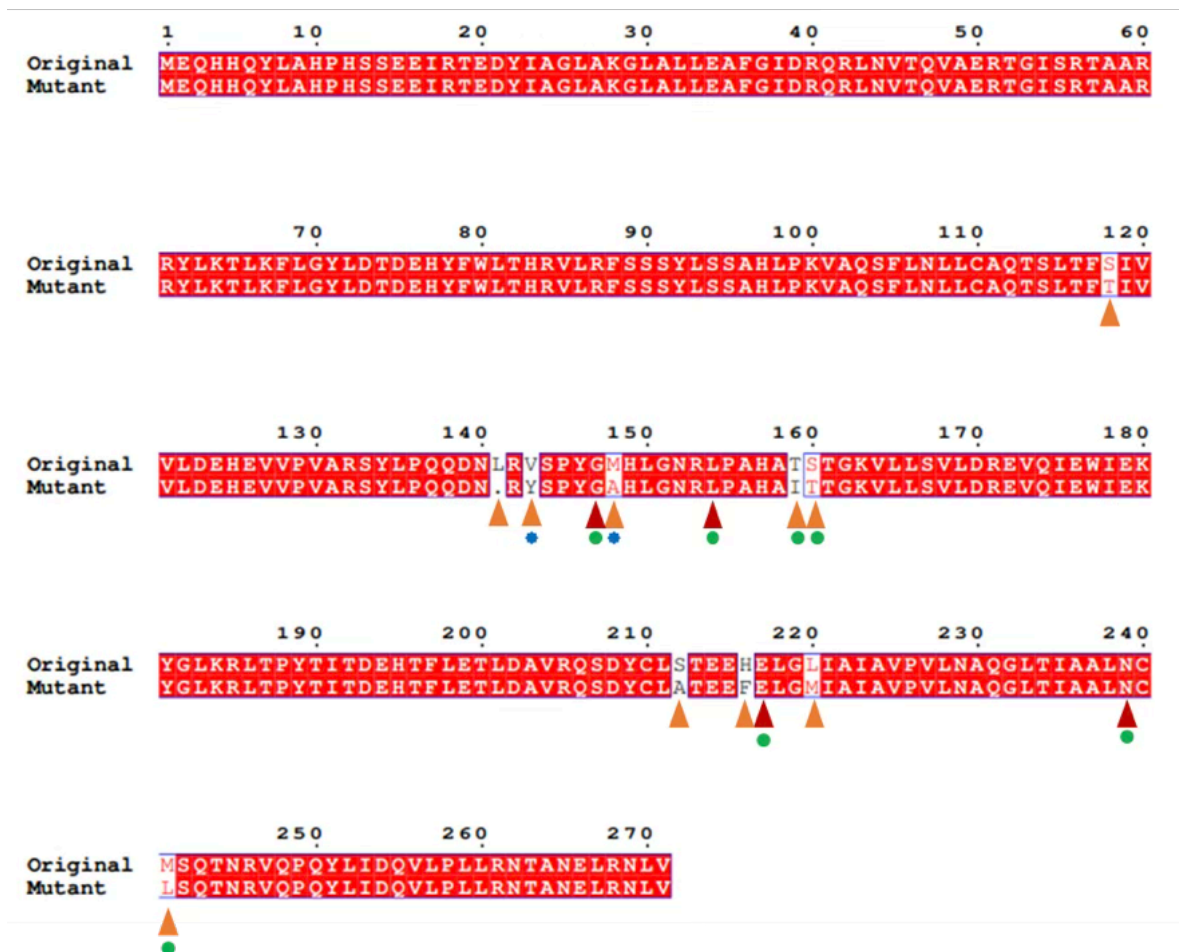

▲ Original residue ▲ Mutant residue ● Ligand binding residue ● Loop shape residue

56

57 **Figure S4. Sequence comparison of wild-type PobR and the evolved PobR\_v10 variant.** Amino  
58 acid sequences of wild-type PobR and PobR\_v10 are aligned, with mutated residues indicated by  
59 triangles. Wild-type and substituted residues are highlighted in red and yellow, respectively.  
60 Residues predicted to be located near the modeled TPA-binding region are marked with green  
61 circles, whereas residues associated with loop remodeling are indicated by blue circles.

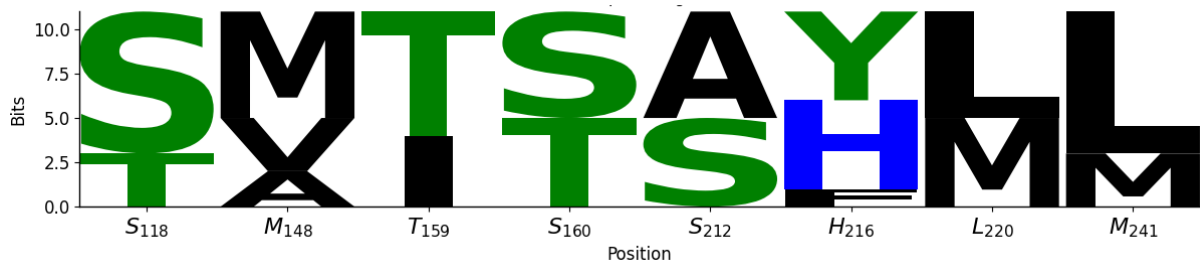

62

63 **Fig S5. Sequence logo analysis of amino acid distributions at mutagenized PobR positions**

64 **recovered during TPA-responsive evolution.** Sequence logo representation of amino acid

65 distributions at the eight displayed mutagenized positions (S118, M148, T159, S160, S212, H216,

66 L220, and M241) identified across PobR variants (v1–v10) during directed evolution toward TPA

67 responsiveness. Letter height is proportional to the frequency of each amino acid at the

68 corresponding position among the recovered variants

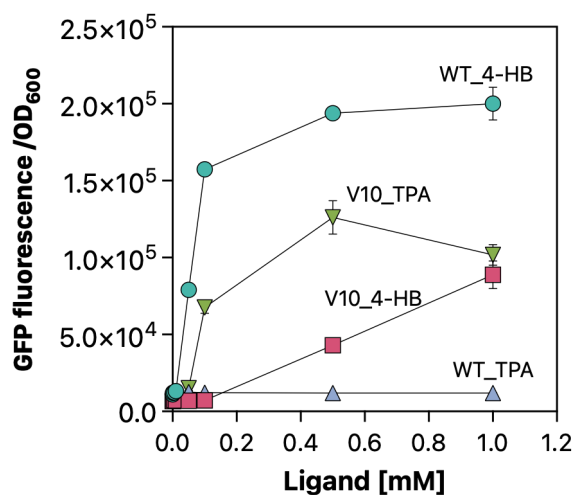

69

70 **Figure S6. Dose-response comparison of PobR<sub>2</sub> and PobR<sub>3</sub> toward 4-HB and TPA over the**  
 71 **0-1.0 mM range.** Green circles indicate the fluorescence intensity of PobR<sub>2</sub> in response to 4-HB,  
 72 and yellow circles indicate the fluorescence intensity of PobR<sub>2</sub> in response to TPA. Blue circles  
 73 indicate the fluorescence intensity of PobR<sub>3</sub> in response to 4-HB, whereas pink circles indicate  
 74 the fluorescence intensity of PobR<sub>3</sub> in response to TPA. Error bars represent the standard  
 75 deviation of duplicate experiments.

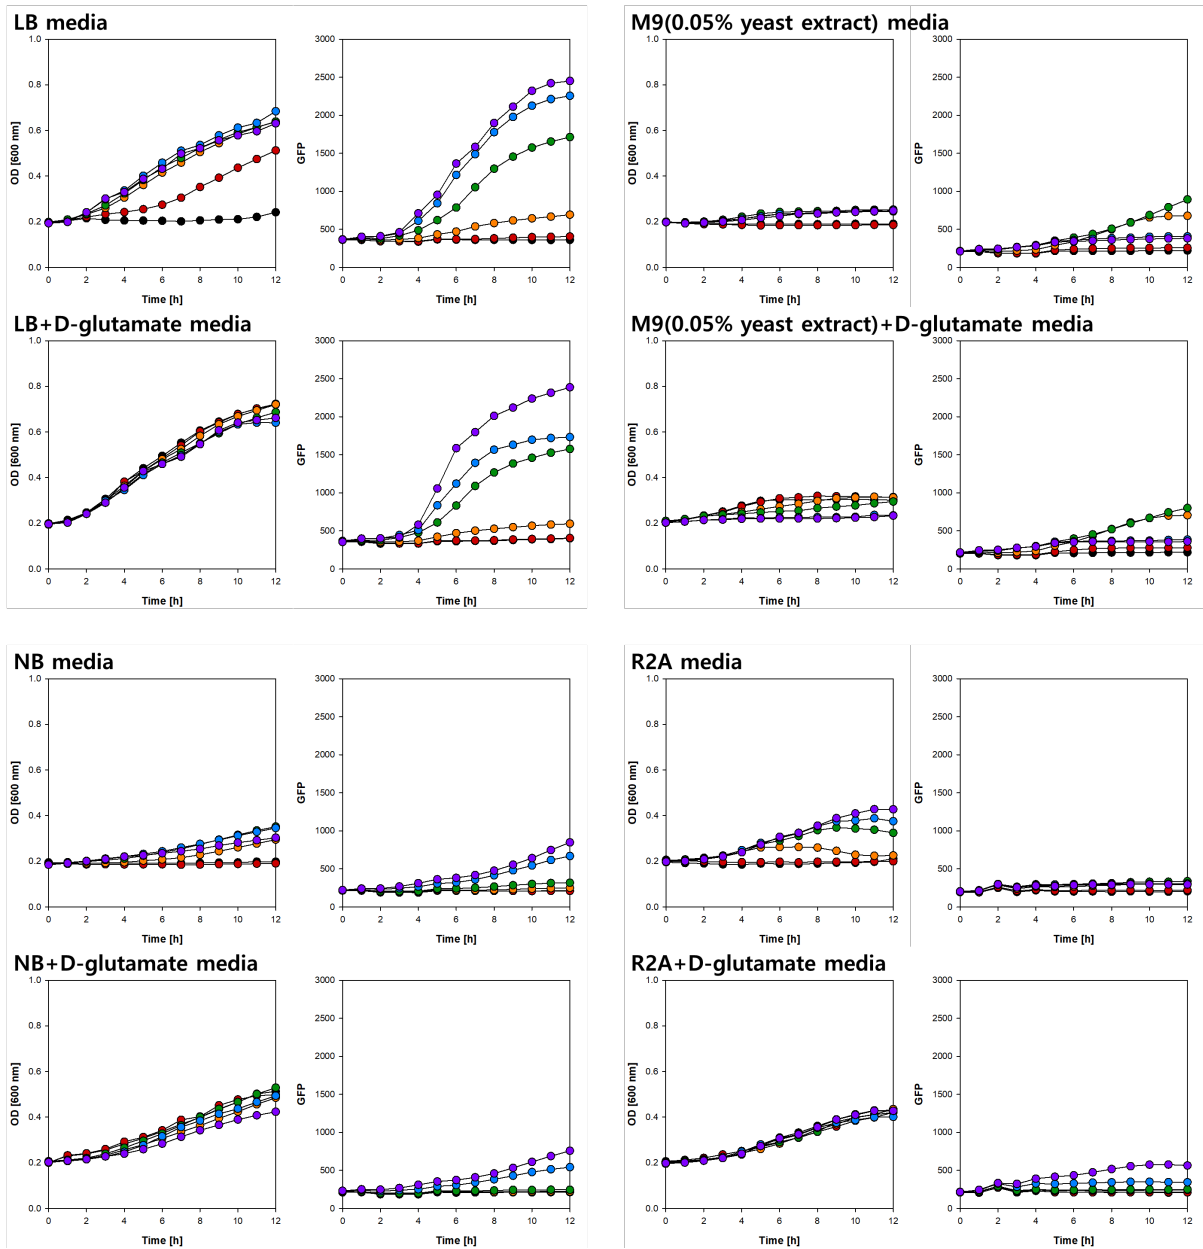

76

77 **Figure S7. Growth curves and fluorescence outputs of PobR\_4 in different media. PobR\_4**  
 78 **cells were grown in LB, NB, M9, and R2A media with or without D-glutamate. Black, red, yellow,**  
 79 **green, blue, and purple circles indicate TPA concentrations of 0, 0.01, 0.05, 0.1, 0.5, and 1 mM,**  
 80 **respectively.**

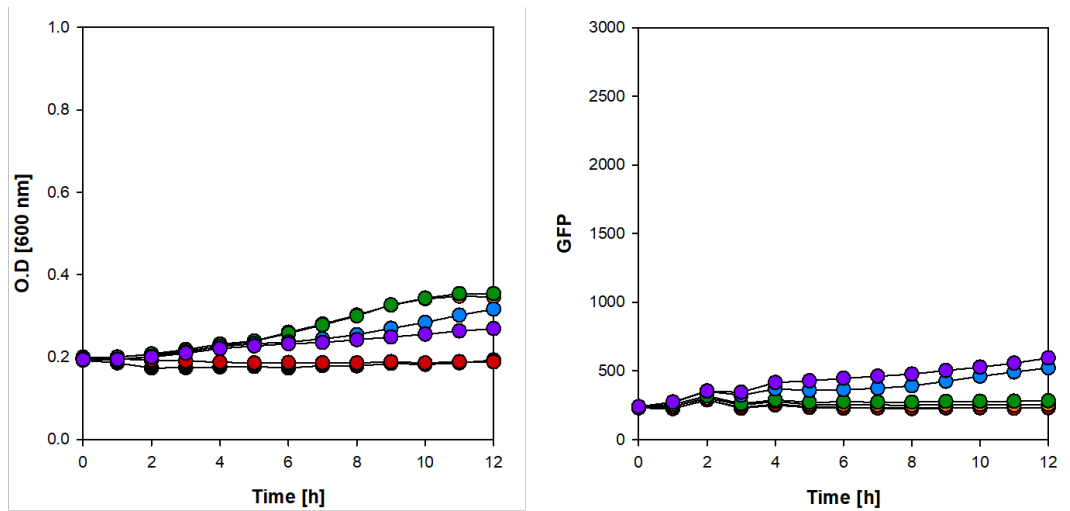

81

82 **Figure S8. Growth curves and fluorescence outputs of Pobr\_4 in 1/10-diluted LB medium.**

83 Pobr\_4 cells were grown in 1/10-diluted LB medium with or without D-glutamate. Black, red,  
 84 yellow, green, blue, and purple circles indicate TPA concentrations of 0, 0.01, 0.05, 0.1, 0.5, and  
 85 1 mM, respectively.

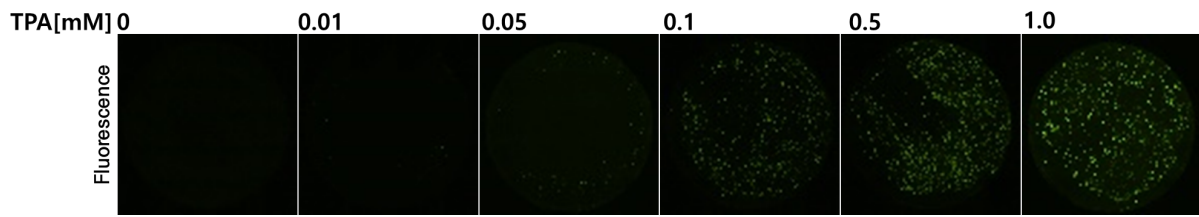

86

87 **Figure S9. Colony formation and fluorescence of Pobr\_4 on solid LB agar containing**

88 **increasing TPA concentrations.** Pobr\_4 cells were plated on LB agar without D-glutamate and

89 supplemented with the indicated concentrations of TPA. Colony formation and fluorescence

90 increased in a TPA concentration-dependent manner.

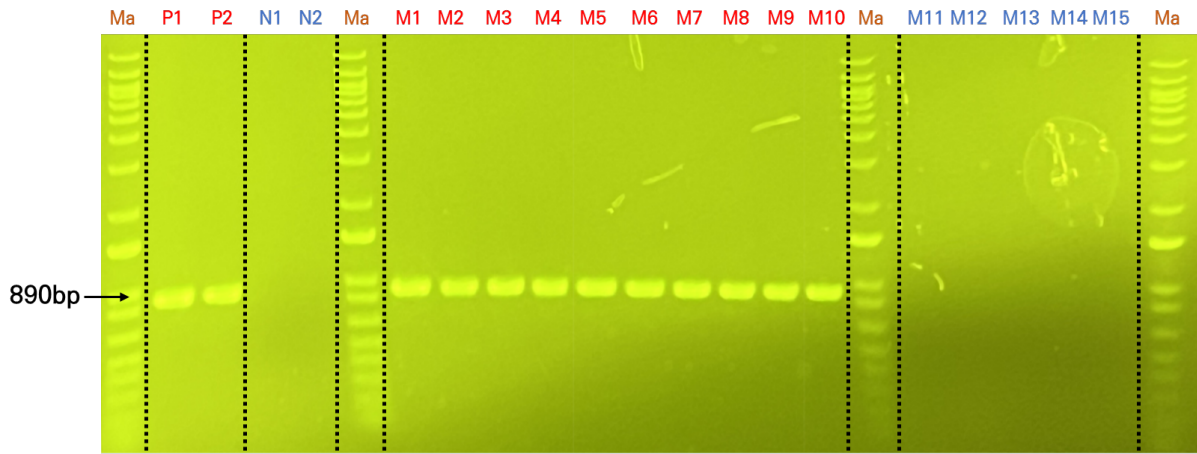

91

92 **Figure S10. Colony PCR analysis of colonies recovered from the proof-of-concept screening**

93 **assay.** P1 and P2 were selected from positive-control plates, N1 and N2 were selected from

94 negative-control plates, and M1–M15 were selected from mixed plates. The expected 890-bp lcc

95 amplicon was detected in colonies associated with surrounding biosensor fluorescence,

96 confirming the presence of the LCC expression construct.

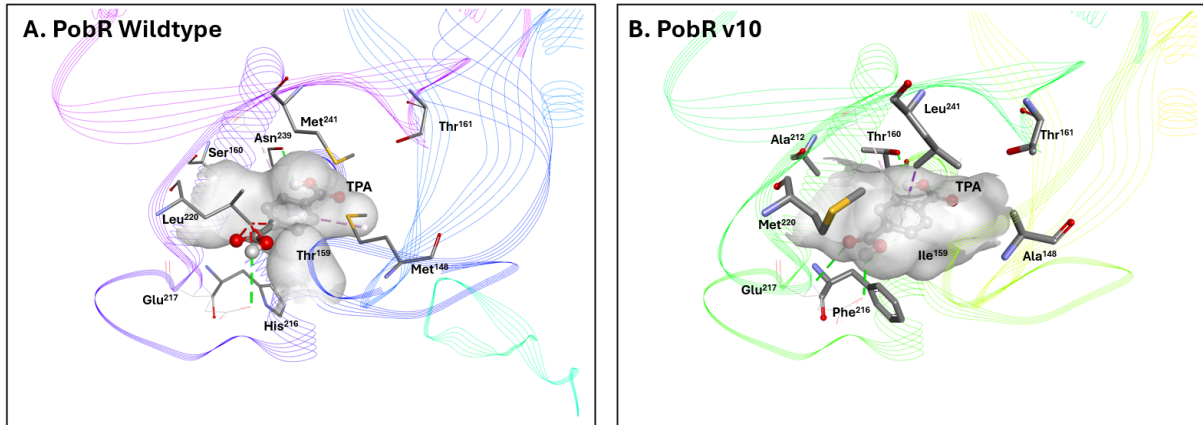

97

98 **Figure S11. Structural comparison of the predicted ligand-binding pockets of wild-type**  
 99 **PobR and PobR\_10 with docked TPA.** (A) Predicted ligand-binding pocket of wild-type PobR  
 100 with TPA mapped onto the model. In the wild-type configuration, Met148 and Leu220 are  
 101 predicted to create steric constraints near the pocket interior, potentially limiting productive  
 102 accommodation of TPA. Red dashed lines indicate predicted steric constraints. Glu217 is  
 103 positioned away from the distal carboxylate group of TPA in this configuration. (B) Predicted  
 104 ligand-binding pocket of PobR\_10 with docked TPA. The surface representation suggests an  
 105 expanded local pocket geometry relative to wild-type PobR, which may help accommodate the  
 106 distal carboxylate group of TPA. Predicted interactions and pocket changes should be  
 107 interpreted as computational hypotheses rather than experimentally resolved structural  
 108 features.
